# Supplementary material
Source: publisher site journal article supplement (https://www.dovepress.com/article/281154)
Supplement: Supplementary file 1 [file get_supplementary_file.php]

**(Additional File1)**

**Knowledge, Attitude and Practices of Healthcare professionals toward Medication errors concept and Reporting system**

Thank you for participation in this study. The aim of this questionnaire is to study the opinion and attitude toward medication errors concept and reporting system, which may help to find solutions aimed to improve medication errors reporting system among healthcare professionals in Saudi Arabia.

Please be advised that all information will be dealt with in strict confidence and will be used for research purposes only.

***Please answer all of the questions to the best of your ability.***

| **Section 1: Demographic data** | | | | | | |
| --- | --- | --- | --- | --- | --- | --- |
| 1. **Hospital setting:** | | | | | | |
| ……………………………………………………………………………………at……………….. | | | | | | |
| 1. **Health profession:** | | | | | | |
| - Physician | | - Pharmacist | | | - Nurse | |
| 1. **Nationality:** | | | | | | |
| - Saudi | | | - Non-Saudi | | | |
| 1. **Gender:** | | | | | | |
| - Male | | | - Female | | | |
| 1. **Age(years):** | | | | | | |
| - <35 | | - 35-45 | | | - >45 | |
| 1. **Work experience in specialty(years):** | | | | | | |
| - <5 | | - 5-15 | | | - >15 | |
| 1. **Educational level:** | | | | | | |
| - Diploma Degree | - Bachelor's Degree | | | - Master's Degree | | - PhD. Degree |

**Section 2. Healthcare Professionals KNOWLEDGE about Medication errors concept and Reporting system:**

1. Have you heard of "medication error report form"?
2. Yes
3. No
4. In your opinion, the main objective of medication error reporting system is?
5. Determine the safe use of the medication.
6. Calculate incidence of the medication errors
7. Identify factor that cause medication errors
8. All of the above
9. Did you know that filling out the medication errors report form is a requirement for reliability where you work?
10. Yes
11. No
12. The stages of medication errors are:
13. Prescribing, transcription, dispensing, administration, patient education.
14. Prescribing, transcription, independent double-check, administration, monitoring.
15. Prescribing, transcription, dispensing, administration, monitoring.
16. Prescribing, transcription, dispensing, clinical verification, monitoring.

**Section 3. Healthcare Professionals ATTITUDE about Medication errors concept and Reporting system:**

1. To what extent do you agree with this statement: medication errors report are an important patient safety topic?
2. Strongly disagree
3. Disagree
4. Neutral
5. Agree
6. Strongly agree
7. To what extent do you agree with this statement: I believe I have good knowledge of when a medication errors should be reported:
8. Strongly disagree
9. Disagree
10. Neutral
11. Agree
12. Strongly agree
13. What do you think about the statement: Information I disclose when reporting a medication errors will be confidential
14. Strongly disagree
15. Disagree
16. Neutral
17. Agree
18. Strongly agree
19. What do you think about the statement: It is not my responsibility to report medication error caused by someone else
20. Strongly disagree
21. Disagree
22. Neutral
23. Agree
24. Strongly agree
25. What do you think about the statement: I prefer to educate people who make medication errors rather than report the errors
26. Strongly disagree
27. Disagree
28. Neutral
29. Agree
30. Strongly agree
31. What do you think about the statement: I fear being blamed if I report medication errors, I made.
32. Strongly disagree
33. Disagree
34. Neutral
35. Agree
36. Strongly agree
37. What do you think about the statement : pharmacist has important role in reducing medication errors:
38. Strongly disagree
39. Disagree
40. Neutral
41. Agree
42. Strongly agree
43. Who do you think is responsible for filling out the medication errors report?

1. Physician
2. Pharmacist
3. Nurse
4. All of them
5. What do you think about the statement: Medication error need to be report only when error reach to patient and cause harm (e.g. requiring monitoring/hospitalization).
6. Strongly disagree
7. Disagree
8. Neutral
9. Agree
10. Strongly agree
11. During your professional practice, what kind of medication errors should be report?
12. Medication errors that lead to patient death
13. Rare medication errors which cause permanent patient harm
14. Medication errors that did not cause harm to patient
15. All of the above
16. Would you report about the wrong dose of drug as a medication errors?
17. Yes
18. No
19. Would you report about the wrong duration of drug as medication errors?
20. Yes
21. No
22. Do you consider near-misses as medication errors?
23. Yes
24. No
25. Would you report about a near-miss?
26. Yes
27. No

**Section 4. Healthcare Professionals PARACTICS about Medication errors reporting system:**

1. At your workplace, how often do you encounter medication errors:
2. Daily
3. Monthly
4. Rarely
5. Not aware of any medication errors
6. Have you ever reported a medication error?
7. Yes
8. No
9. If you answered YES, is the procedure of medication errors reporting :
10. Complicated and lengthy
11. Somewhat complicated
12. Easy and fast
13. Somewhat easy
14. Have you had difficulty or barriers to reporting about medication errors?
15. Yes
16. No
17. In your opinion, the one main reason that hinders healthcare professional from reporting medication errors is?
18. Legal implication
19. Worried about collision with others
20. Impairs reputation
21. No time, too busy
22. How do you perceive your level of activity in preventing medication errors?
23. Very effective
24. Somewhat effective
25. Not so effective
26. Not at all effective
27. In your opinion, do you think the" look-alike and sound-alike medication problem (LASA)" is the main cause or contributing factor of medication errors in your hospital?
28. Strongly disagree
29. Disagree
30. Neutral
31. Agree
32. Strongly agree
33. In your opinion, do you think the medication errors related to "high-alert medications" is reducing according to CBAHI standards in your hospital?

1. Strongly disagree
2. Disagree
3. Neutral
4. Agree
5. Strongly agree
6. In your opinion, do you think the "perform root cause analysis "will reducing the repetition of fatal medication errors at your hospital?
7. Strongly disagree
8. Disagree
9. Neutral
10. Agree
11. Strongly agree
12. Do you use or have an electronic system for reporting medication errors in your hospital?
13. Yes
14. No
15. Have you had training in medication errors reporting system in the last 24 months?
16. Yes
17. No
18. How often do you think that employees should have training in medication errors reporting system?
19. Every 3 months
20. Every 6 months
21. Annually (every year)
22. Every 2 years

***Thank you***
